# Supplementary material for: Usage of CoOOH electrodes in a flow channel reactor for the non-alkaline oxidation of 5-(hydroxymethyl)-furfural: an upscaling study
Source: Royal Society of Chemistry journal article supplement (doi:10.1039/d4re00511b), 2024-11-22
Supplement: d4re00511b1.pdf [file d4re00511b1.pdf]

## Supporting information

### Design of the 3E-flow cell

The design of the three-electrode flow cell (MicroFlowCell, ELECTROCELL, Denmark) is schematically shown in Figure S1. The cell consisted of two PTFE end plates (120 x 70 x 12 mm), two titanium sheets (95 x 45 x 1 mm, Eisenhuth GmbH, Germany) that served as working and counter electrodes and two PTFE flow frames (95 x 45 x 2.1 mm, ELECTROCELL, Denmark). The electrode compartments were separated by a fumasep FTAM-E anion exchange membrane (FumaTech, Germany). Viton gaskets, cut from a 2000 x 1200 x 1 mm piece (Technikplaza GmbH, Germany), were installed between each component (membrane, electrodes, flow frames and end plates). The surface area of the electrodes was defined by rectangular windows cut into the gaskets between the electrodes, flow frames and the membrane. Thus, 30 x 33 mm windows gave an electrode surface of ca. 10.0 cm<sup>2</sup> and a filling volume of 4.1 mL (defined by the electrode surface and the distance between electrode and membrane). Potentials were measured against a leak free Ag/AgCl 3.4 M KCl capillary reference electrode (Innovative Instruments, USA), which was inserted into the WE compartment through a hole in the respective flow frame. The flow was established by a Masterflex Reglo peristaltic pump (Cole-Parmer, USA) equipped with 2.06 mm ID Viton tubes (Cole-Parmer, USA).

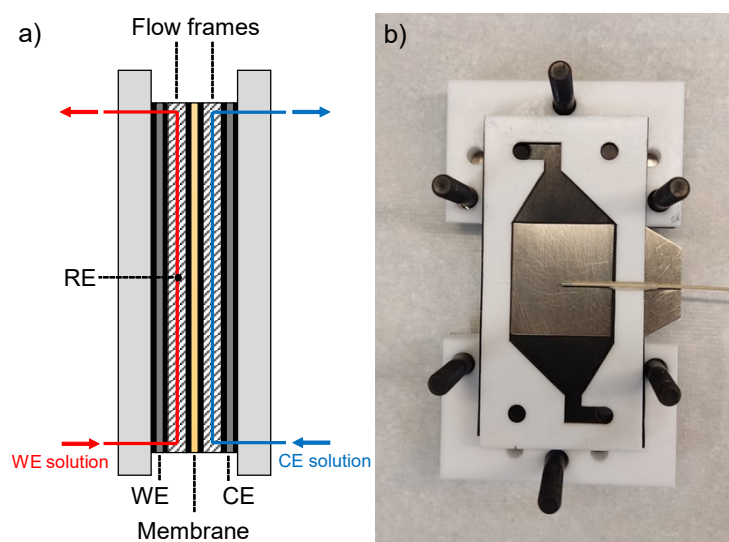

Figure S1: a) Schematic illustration of the used 3E-flow cell (not to scale) and b) photography of the open working electrode compartment with PTFE flow frame.

### Design of the 2E-flow cell

The two-electrode flow cell was a custom-made cell from Eisenhuth GmbH (Germany). The cell design is schematically shown in Figure S2. The cell consisted of two stainless steel end plates (125 x 125 x 18 mm), two circular stainless steel contacting plates and two circular titanium electrodes (each 90 mm in diameter). A Viton layer, cut from a 2000 x 1200 x 1 mm piece (Technikplaza GmbH, Germany) was installed between the contacting plates and the end plates for electrical insulation. The flow design was based on two spiral-shaped channels (580 x 1.5 x 1.5 mm). This gave an electrode surface of 52.2 cm<sup>2</sup> and a filling volume of 2.6 mL in both compartments. The electrode compartments were separated with a fumasep FTAM-E anion exchange membrane (FumaTech, Germany) for the CoOOH coating experiments and with a fumasep FM-FKM cation exchange membrane (FumaTech, Germany) for the HMF oxidation experiments. The flow was established by a Masterflex Reglo peristaltic pump (Cole-Parmer, USA) equipped with 2.06 mm ID Viton tubes (Cole-Parmer, USA). The temperature was controlled by pipes embedded into the end plates, which were connected to a

thermostat (Ecoline E103, Lauda, Germany). A water / ethylene glycol mixture (50 / 50 %<sub>vol</sub>) was used as heat transfer medium.

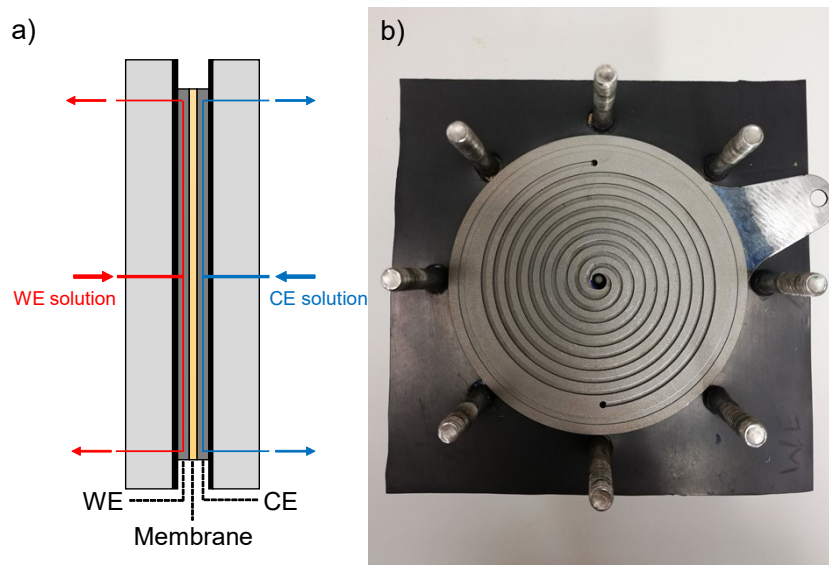

Figure S2: a) Schematic illustration of the used 2E-flow cell (not to scale) and b) photography of the open working electrode compartment.

### Definition of performance parameters

Eqs. (S1) – (S3) were used to calculate the HMF conversion  $X$ , the product yield  $Y$  and the Coulomb efficiencies  $CE$ . The total Coulomb efficiency  $CE_{\text{tot}}$  was calculated from the  $CE$  values of the single products according to eq. S4. For all equations, a stoichiometric coefficient of  $\nu = 1$  is assumed.

$$X = \frac{n_{\text{educt}, 0} - n_{\text{educt}, t}}{n_{\text{educt}, 0}} \cdot 100 \% \quad (\text{S1})$$

$$Y = \frac{n_{\text{product}, t}}{n_{\text{educt}, 0}} \cdot 100 \% \quad (\text{S2})$$

$$CE = \frac{Q_{\text{ideal}}}{Q_{\text{experiment}}} \cdot 100 \% = \frac{n_{\text{product}, t} \cdot z \cdot F}{Q_{\text{experiment}}} \cdot 100 \% \quad (\text{S3})$$

$$CE_{\text{tot}} = CE_{\text{DFF}} + CE_{\text{HMFCA}} + CE_{\text{FFCA}} + CE_{\text{FDCA}} \quad (\text{S4})$$

$$MB = \frac{n_{\text{educt}, t} + \sum n_{\text{product}, t}}{n_{\text{educt}, 0}} \cdot 100 \% \quad (\text{S5})$$

|                           |                                                 |
|---------------------------|-------------------------------------------------|
| $n_{\text{educt}, 0}$ :   | amount of educt at the start of the reaction    |
| $n_{\text{educt}, t}$ :   | amount of educt at the end of the reaction      |
| $n_{\text{product}, t}$ : | amount of product at the end of the reaction    |
| $Q_{\text{ideal}}$ :      | charge necessary for full conversion to product |
| $Q_{\text{experiment}}$ : | total charge transferred during the experiment  |
| $z$ :                     | number of electrons                             |
| $F$ :                     | Faraday's constant                              |

## Calculation of Reynolds numbers

The Reynolds numbers of the 2E-flow cell is calculated according to eq. (S6).

$$\text{Re} = \frac{V_{\text{lin}} \cdot d}{\nu} \quad (\text{S6})$$

$V_{\text{lin}}$ : linear velocity of the medium  
 $d$ : characteristic diameter (since flow channel has a quadratic profile: channel width)  
 $\nu$ : kinematic viscosity of the medium

Since the flow channel has a quadratic profile,  $d$  is equal to the channel width (1.5 mm). The kinematic viscosity of water at RT – 80 °C was used.

## Additional Figures

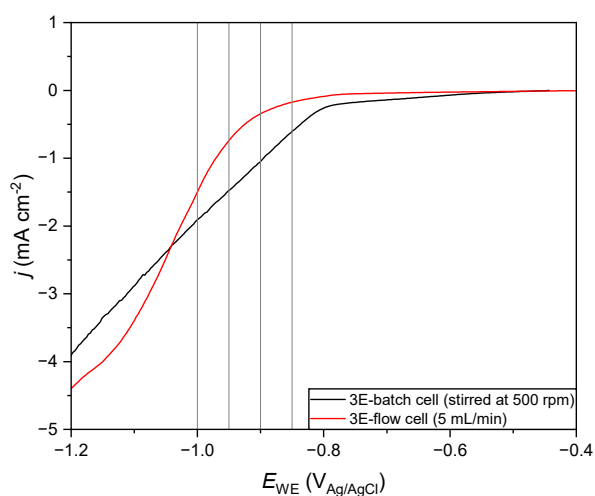

Figure S3: LSVs of Ti electrodes in 50 mM  $\text{Co}(\text{NO}_3)_2$  solution in the unseparated 3E-batch cell and the separated 3E-flow cell (scan rate:  $10 \text{ mV s}^{-1}$ ). Potentials used for  $\text{Co}(\text{OH})_2$  deposition are indicated.

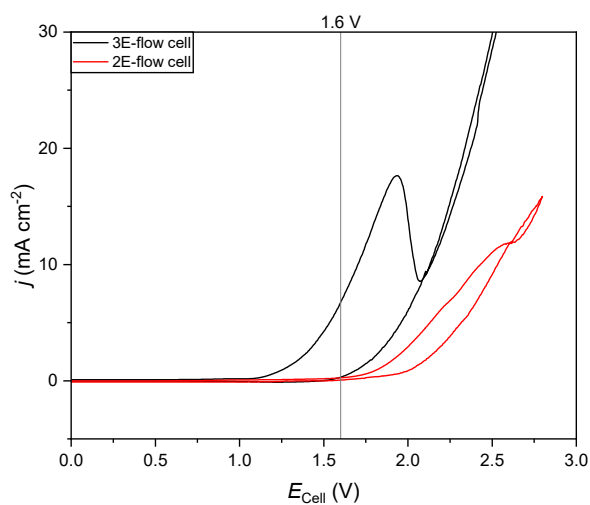

Figure S4: Cell voltage ramps of  $\text{Ti}/\text{Co}(\text{OH})_2$  electrodes of the 3E-flow cell and the 2E-flow cell in 1.0 M NaOH solution (scan rate:  $10 \text{ mV s}^{-1}$ ). The films were deposited at a constant voltage of  $-2.75 \text{ V}$  with a charge density  $\sigma_{\text{Red}}$  of  $0.4 \text{ C cm}^{-2}$ .

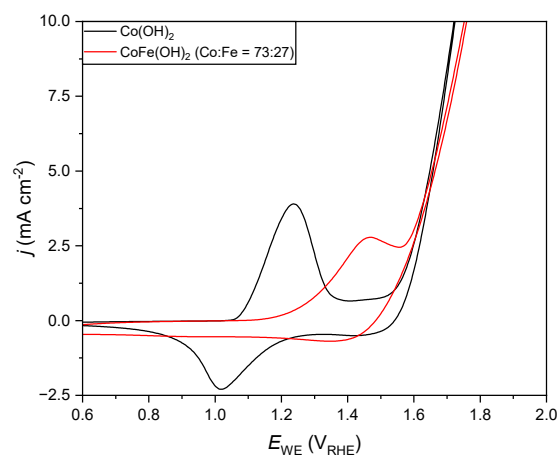

Figure S5: Exemplary cyclic voltammograms of Ti/Co(OH)<sub>2</sub> and Ti/CoFe(OH)<sub>2</sub> batch cell electrodes in 1.0 M NaOH (scan rate: 10 mV s<sup>-1</sup>). Both films were deposited with  $\sigma_{\text{Red}} = 0.8 \text{ C cm}^{-2}$  according to the standard procedure for batch cells given in the experimental section. For the CoFe(OH)<sub>2</sub> coating, a mixture of Co(NO<sub>3</sub>)<sub>2</sub> and Fe(NO<sub>3</sub>)<sub>2</sub> with a total cation concentration of 50 mM was used. The Co:Fe ratio was determined after the measurement by dissolving the film in 10 mL HCl (20 %) and analyzing the solution via ICP-OES.

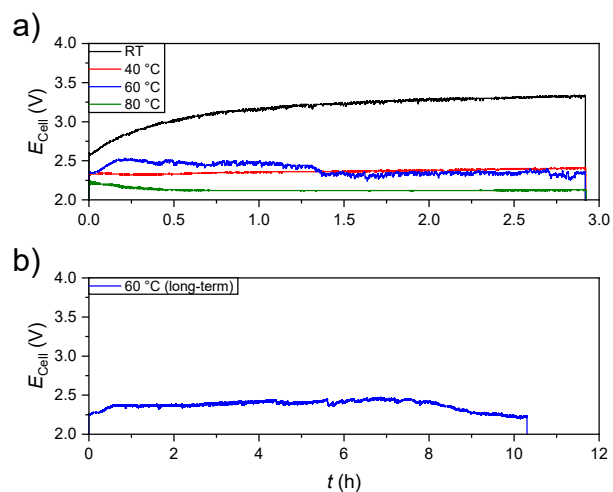

Figure S6: Exemplary cell voltage curves of the HMF oxidation experiments.

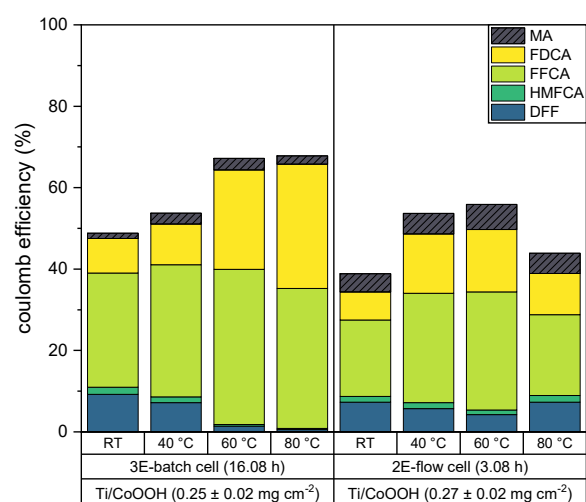

Figure S7: Coulomb efficiencies ( $CE$ ) of the HMF oxidation in the 3E-batch cell and the 2E-flow cell at different temperatures. The  $CE$  values of DFF, HMFCFA, FFCA and FDCA were summed up to form the total Coulomb efficiency ( $CE_{tot}$ ). To calculate the  $CE$  of MA, full oxidation of the two  $C_1$  products to  $CO_2$  was assumed, resulting in a transport of  $12 e^-$  per molecule.

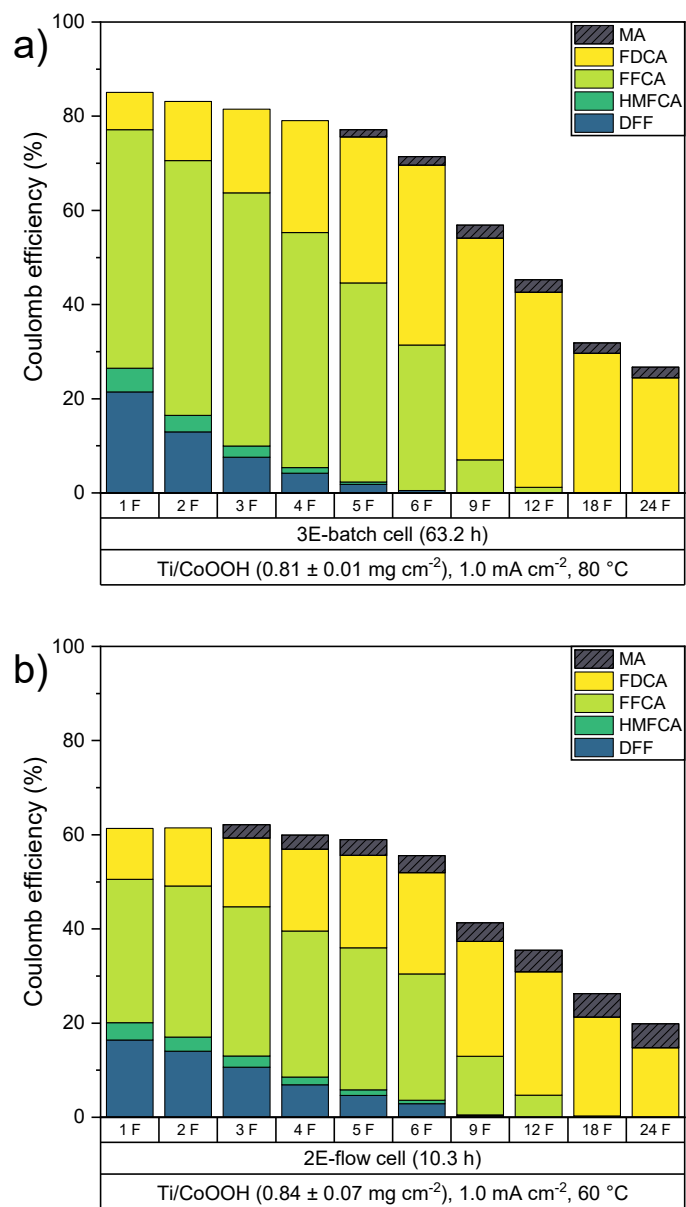

Figure S8: Coulomb efficiencies ( $CE$ ) of the optimized HMF oxidations in the 3E-batch cell and the 2E-flow cell. The  $CE$  values of DFF, HMFCA, FFCA and FDCA were summed up to form the total Coulomb efficiency ( $CE_{\text{tot}}$ ). To calculate the  $CE$  of MA, full oxidation of the two  $C_1$  products to  $\text{CO}_2$  was assumed, resulting in a transport of  $12 \text{ e}^-$  per molecule.

## Additional Tables

Table S1: Performance parameters of the oxidation of 20 mM HMF solutions in acetate buffer (pH 5) in the 3E-batch cell and the 2E-flow cell ( $j = 1.0 \text{ mA cm}^{-2}$ ,  $m_{\text{CoOOH}} = 0.26 \pm 0.03 \text{ mg cm}^{-2}$ , 6 F transported). Mean values and standard deviations of duplicate reactions are given.\*

|               | $T (^{\circ}\text{C})$ | $X (\%)$       | $MB (\%)$      | Product | $Y (\%)$       | $CE (\%)$      |
|---------------|------------------------|----------------|----------------|---------|----------------|----------------|
| 3E-batch cell | RT                     | $89.9 \pm 1.6$ | $92.1 \pm 1.7$ | DFF     | $27.0 \pm 4.3$ | $9.2 \pm 1.5$  |
|               |                        |                |                | HMFCFA  | $5.2 \pm 0.4$  | $1.8 \pm 0.1$  |
|               |                        |                |                | FFCA    | $41.0 \pm 2.8$ | $28.1 \pm 1.9$ |
|               |                        |                |                | FDCA    | $8.3 \pm 1.7$  | $8.5 \pm 1.8$  |
|               |                        |                |                | MA**    | $0.6 \pm 0.1$  | $1.3 \pm 0.3$  |
|               | 40                     | $93.3 \pm 2.8$ | $90.2 \pm 0.8$ | DFF     | $20.9 \pm 6.7$ | $7.2 \pm 2.3$  |
|               |                        |                |                | HMFCFA  | $4.2 \pm 0.8$  | $1.4 \pm 0.3$  |
|               |                        |                |                | FFCA    | $47.4 \pm 5.9$ | $32.5 \pm 4.0$ |
|               |                        |                |                | FDCA    | $9.7 \pm 4.0$  | $10.0 \pm 4.1$ |
|               |                        |                |                | MA**    | $1.3 \pm 0.4$  | $2.7 \pm 0.7$  |
|               | 60                     | $98.9 \pm 0.4$ | $86.8 \pm 1.6$ | DFF     | $4.1 \pm 1.9$  | $1.4 \pm 0.6$  |
|               |                        |                |                | HMFCFA  | $1.1 \pm 0.3$  | $0.4 \pm 0.1$  |
|               |                        |                |                | FFCA    | $55.5 \pm 2.0$ | $38.2 \pm 1.3$ |
|               |                        |                |                | FDCA    | $23.6 \pm 2.9$ | $24.4 \pm 3.0$ |
|               |                        |                |                | MA**    | $1.4 \pm 0.1$  | $2.8 \pm 0.3$  |
|               | 80                     | $99.2 \pm 0.1$ | $84.9 \pm 0.5$ | DFF     | $1.7 \pm 0.2$  | $0.6 \pm 0.1$  |
|               |                        |                |                | HMFCFA  | $0.7 \pm 0.0$  | $0.3 \pm 0.0$  |
|               |                        |                |                | FFCA    | $50.7 \pm 0.3$ | $34.4 \pm 0.0$ |
|               |                        |                |                | FDCA    | $29.7 \pm 0.7$ | $30.5 \pm 0.8$ |
|               |                        |                |                | MA**    | $1.0 \pm 0.1$  | $2.0 \pm 0.1$  |
| 2E-flow cell  | RT                     | $74.7 \pm 2.7$ | $88.1 \pm 1.1$ | DFF     | $21.6 \pm 1.3$ | $7.3 \pm 0.5$  |
|               |                        |                |                | HMFCFA  | $4.2 \pm 0.0$  | $1.4 \pm 0.0$  |
|               |                        |                |                | FFCA    | $27.9 \pm 3.4$ | $18.8 \pm 2.2$ |
|               |                        |                |                | FDCA    | $6.9 \pm 1.7$  | $6.9 \pm 1.7$  |
|               |                        |                |                | MA**    | $2.2 \pm 0.1$  | $4.5 \pm 0.3$  |
|               | 40                     | $87.1 \pm 0.5$ | $91.2 \pm 1.0$ | DFF     | $16.9 \pm 1.4$ | $5.7 \pm 0.5$  |
|               |                        |                |                | HMFCFA  | $4.5 \pm 0.3$  | $1.5 \pm 0.1$  |
|               |                        |                |                | FFCA    | $39.9 \pm 1.1$ | $26.8 \pm 0.7$ |
|               |                        |                |                | FDCA    | $14.5 \pm 2.0$ | $14.6 \pm 2.0$ |
|               |                        |                |                | MA**    | $2.5 \pm 0.0$  | $5.0 \pm 0.0$  |
|               | 60                     | $86.3 \pm 1.7$ | $90.1 \pm 1.8$ | DFF     | $12.5 \pm 0.4$ | $4.3 \pm 0.1$  |
|               |                        |                |                | HMFCFA  | $3.3 \pm 0.3$  | $1.1 \pm 0.1$  |
|               |                        |                |                | FFCA    | $42.6 \pm 0.8$ | $29.0 \pm 0.2$ |
|               |                        |                |                | FDCA    | $15.0 \pm 0.1$ | $15.3 \pm 0.3$ |
|               |                        |                |                | MA**    | $3.0 \pm 0.8$  | $6.2 \pm 1.6$  |
|               | 80                     | $78.5 \pm 4.1$ | $90.5 \pm 0.7$ | DFF     | $21.8 \pm 3.1$ | $7.3 \pm 1.0$  |
|               |                        |                |                | HMFCFA  | $4.9 \pm 1.0$  | $1.6 \pm 0.3$  |
|               |                        |                |                | FFCA    | $29.8 \pm 1.9$ | $19.9 \pm 1.2$ |
|               |                        |                |                | FDCA    | $10.0 \pm 1.7$ | $10.1 \pm 1.7$ |
|               |                        |                |                | MA**    | $2.5 \pm 0.5$  | $5.0 \pm 0.9$  |

\* Although standard deviations should generally only be used for at least three replicates, we chose these values for a better comparability with the respective reaction performance data.

\*\* To calculate the  $CE$  of MA, full oxidation of the two  $C_1$  products to  $\text{CO}_2$  was assumed, resulting in a transport of  $12 e^-$  per molecule.

Table S2: Performance parameters of the oxidation of 20 mM HMF solutions in acetate buffer (pH 5) under optimized conditions in the 3E-batch cell ( $j = 1.0 \text{ mA cm}^{-2}$ ,  $80 \text{ }^{\circ}\text{C}$ ,  $m_{\text{CoOOH}} = 0.81 \pm 0.01 \text{ mg cm}^{-2}$ ). Mean values and standard deviations of duplicate reactions are given.\*

|             | <i>X (%)</i>   | <i>MB (%)</i>  | Product | <i>Y (%)</i>   | <i>CE (%)</i>  |
|-------------|----------------|----------------|---------|----------------|----------------|
| <b>1 F</b>  | $28.8 \pm 0.5$ | $98.5 \pm 0.7$ | DFF     | $10.8 \pm 0.2$ | $21.5 \pm 0.3$ |
|             |                |                | HMFCA   | $2.5 \pm 0.2$  | $5.0 \pm 0.4$  |
|             |                |                | FFCA    | $12.7 \pm 0.0$ | $50.7 \pm 0.1$ |
|             |                |                | FDCA    | $1.3 \pm 0.2$  | $7.9 \pm 1.0$  |
|             |                |                | MA**    | n.q.           | n.q.           |
| <b>2 F</b>  | $52.2 \pm 0.1$ | $95.6 \pm 0.8$ | DFF     | $13.0 \pm 0.5$ | $13.0 \pm 0.5$ |
|             |                |                | HMFCA   | $3.5 \pm 0.2$  | $3.5 \pm 0.2$  |
|             |                |                | FFCA    | $27.1 \pm 0.1$ | $54.1 \pm 0.1$ |
|             |                |                | FDCA    | $4.2 \pm 0.2$  | $12.6 \pm 0.5$ |
|             |                |                | MA**    | n.q.           | n.q.           |
| <b>3 F</b>  | $71.4 \pm 0.1$ | $92.5 \pm 0.5$ | DFF     | $11.4 \pm 0.5$ | $7.6 \pm 0.3$  |
|             |                |                | HMFCA   | $3.4 \pm 0.2$  | $2.3 \pm 0.1$  |
|             |                |                | FFCA    | $40.2 \pm 0.0$ | $53.8 \pm 0.1$ |
|             |                |                | FDCA    | $8.9 \pm 0.3$  | $17.8 \pm 0.6$ |
|             |                |                | MA**    | n.q.           | n.q.           |
| <b>4 F</b>  | $86.2 \pm 0.0$ | $89.6 \pm 0.6$ | DFF     | $8.3 \pm 0.3$  | $4.2 \pm 0.2$  |
|             |                |                | HMFCA   | $2.4 \pm 0.3$  | $1.2 \pm 0.1$  |
|             |                |                | FFCA    | $49.5 \pm 0.1$ | $49.9 \pm 0.2$ |
|             |                |                | FDCA    | $15.7 \pm 0.4$ | $23.7 \pm 0.6$ |
|             |                |                | MA**    | n.q.           | n.q.           |
| <b>5 F</b>  | $95.5 \pm 0.1$ | $88.7 \pm 1.0$ | DFF     | $4.4 \pm 0.2$  | $1.8 \pm 0.1$  |
|             |                |                | HMFCA   | $1.3 \pm 0.2$  | $0.5 \pm 0.1$  |
|             |                |                | FFCA    | $52.2 \pm 0.1$ | $42.3 \pm 0.1$ |
|             |                |                | FDCA    | $25.5 \pm 0.4$ | $31.0 \pm 0.6$ |
|             |                |                | MA**    | $0.6 \pm 0.0$  | $1.5 \pm 0.1$  |
| <b>6 F</b>  | $99.0 \pm 0.1$ | $86.5 \pm 1.2$ | DFF     | $1.4 \pm 0.3$  | $0.5 \pm 0.1$  |
|             |                |                | HMFCA   | n.q.           | n.q.           |
|             |                |                | FFCA    | $45.7 \pm 0.5$ | $31.0 \pm 0.4$ |
|             |                |                | FDCA    | $37.6 \pm 0.3$ | $38.2 \pm 0.3$ |
|             |                |                | MA**    | $0.9 \pm 0.1$  | $1.9 \pm 0.3$  |
| <b>9 F</b>  | 100.0          | $86.8 \pm 1.6$ | DFF     | n.q.           | n.q.           |
|             |                |                | HMFCA   | 0.0            | 0.0            |
|             |                |                | FFCA    | $15.3 \pm 1.5$ | $7.0 \pm 0.7$  |
|             |                |                | FDCA    | $69.2 \pm 0.3$ | $47.1 \pm 0.1$ |
|             |                |                | MA**    | $2.0 \pm 0.4$  | $2.8 \pm 0.5$  |
| <b>12 F</b> | 100.0          | $86.9 \pm 1.7$ | DFF     | 0.0            | 0.0            |
|             |                |                | HMFCA   | 0.0            | 0.0            |
|             |                |                | FFCA    | $3.4 \pm 0.5$  | $1.2 \pm 0.2$  |
|             |                |                | FDCA    | $80.9 \pm 0.7$ | $41.4 \pm 0.4$ |
|             |                |                | MA**    | $2.6 \pm 0.4$  | $2.7 \pm 0.5$  |
| <b>18 F</b> | 100.0          | $89.7 \pm 1.9$ | DFF     | 0.0            | 0.0            |
|             |                |                | HMFCA   | 0.0            | 0.0            |
|             |                |                | FFCA    | 0.0            | 0.0            |
|             |                |                | FDCA    | $86.6 \pm 1.3$ | $29.7 \pm 0.5$ |
|             |                |                | MA**    | $3.2 \pm 0.7$  | $2.2 \pm 0.5$  |
| <b>24 F</b> | 100.0          | $99.1 \pm 2.5$ | DFF     | 0.0            | 0.0            |
|             |                |                | HMFCA   | 0.0            | 0.0            |
|             |                |                | FFCA    | 0.0            | 0.0            |
|             |                |                | FDCA    | $94.7 \pm 1.4$ | $24.5 \pm 0.4$ |
|             |                |                | MA**    | $4.4 \pm 1.1$  | $2.2 \pm 0.6$  |

n.q. = not quantifiable



Table S3: Performance parameters of the oxidation of 20 mM HMF solutions in acetate buffer (pH 5) under optimized conditions in the 2E-flow cell ( $j = 1.0 \text{ mA cm}^{-2}$ ,  $60^\circ\text{C}$ ,  $m_{\text{CoOH}} = 0.84 \pm 0.07 \text{ mg cm}^{-2}$ ). Mean values and standard deviations of duplicate reactions are given.\*

|             | <i>X</i> (%)   | <i>MB</i> (%)  | Product | <i>Y</i> (%)   | <i>CE</i> (%)  |
|-------------|----------------|----------------|---------|----------------|----------------|
| <b>1 F</b>  | $20.1 \pm 1.2$ | $99.7 \pm 0.3$ | DFF     | $8.3 \pm 1.1$  | $16.4 \pm 2.2$ |
|             |                |                | HMFCa   | $1.8 \pm 0.2$  | $3.6 \pm 0.4$  |
|             |                |                | FFCA    | $7.7 \pm 1.5$  | $30.5 \pm 5.9$ |
|             |                |                | FDCA    | $1.8 \pm 0.6$  | $10.8 \pm 3.8$ |
|             |                |                | MA**    | n.q.           | n.q.           |
| <b>2 F</b>  | $39.6 \pm 1.5$ | $98.8 \pm 0.1$ | DFF     | $14.4 \pm 2.8$ | $14.0 \pm 2.8$ |
|             |                |                | HMFCa   | $3.1 \pm 0.6$  | $3.0 \pm 0.6$  |
|             |                |                | FFCA    | $16.5 \pm 3.4$ | $32.1 \pm 6.6$ |
|             |                |                | FDCA    | $4.2 \pm 1.7$  | $12.3 \pm 4.9$ |
|             |                |                | MA**    | n.q.           | n.q.           |
| <b>3 F</b>  | $54.6 \pm 3.3$ | $98.6 \pm 0.2$ | DFF     | $16.5 \pm 3.4$ | $10.6 \pm 2.2$ |
|             |                |                | HMFCa   | $3.7 \pm 0.7$  | $2.4 \pm 0.5$  |
|             |                |                | FFCA    | $24.6 \pm 5.0$ | $31.7 \pm 6.4$ |
|             |                |                | FDCA    | $7.6 \pm 2.3$  | $14.6 \pm 4.3$ |
|             |                |                | MA**    | $0.7 \pm 0.1$  | $2.8 \pm 0.3$  |
| <b>4 F</b>  | $66.6 \pm 5.0$ | $97.0 \pm 0.4$ | DFF     | $14.5 \pm 2.0$ | $6.9 \pm 1.0$  |
|             |                |                | HMFCa   | $3.4 \pm 0.4$  | $1.6 \pm 0.2$  |
|             |                |                | FFCA    | $32.5 \pm 5.4$ | $31.0 \pm 5.1$ |
|             |                |                | FDCA    | $12.1 \pm 2.6$ | $17.4 \pm 3.6$ |
|             |                |                | MA**    | $1.0 \pm 0.1$  | $3.0 \pm 0.4$  |
| <b>5 F</b>  | $78.2 \pm 4.1$ | $96.1 \pm 0.9$ | DFF     | $12.3 \pm 1.6$ | $4.6 \pm 0.6$  |
|             |                |                | HMFCa   | $3.1 \pm 0.3$  | $1.2 \pm 0.1$  |
|             |                |                | FFCA    | $40.0 \pm 3.5$ | $30.2 \pm 2.6$ |
|             |                |                | FDCA    | $17.3 \pm 3.5$ | $19.6 \pm 3.9$ |
|             |                |                | MA**    | $1.5 \pm 0.1$  | $3.3 \pm 0.1$  |
| <b>6 F</b>  | $87.3 \pm 3.2$ | $94.7 \pm 0.2$ | DFF     | $9.5 \pm 1.5$  | $2.9 \pm 0.5$  |
|             |                |                | HMFCa   | $2.7 \pm 0.4$  | $0.8 \pm 0.1$  |
|             |                |                | FFCA    | $44.2 \pm 0.8$ | $26.8 \pm 0.4$ |
|             |                |                | FDCA    | $23.7 \pm 4.1$ | $21.5 \pm 3.7$ |
|             |                |                | MA**    | $2.0 \pm 0.0$  | $3.6 \pm 0.1$  |
| <b>9 F</b>  | $98.8 \pm 0.5$ | $92.2 \pm 0.3$ | DFF     | $2.1 \pm 0.6$  | $0.4 \pm 0.1$  |
|             |                |                | HMFCa   | $0.8 \pm 0.2$  | $0.1 \pm 0.0$  |
|             |                |                | FFCA    | $36.5 \pm 3.9$ | $12.5 \pm 1.4$ |
|             |                |                | FDCA    | $47.6 \pm 5.4$ | $24.4 \pm 2.7$ |
|             |                |                | MA**    | $3.9 \pm 0.1$  | $4.0 \pm 0.1$  |
| <b>12 F</b> | 100.0          | $90.2 \pm 0.0$ | DFF     | n.q.           | n.q.           |
|             |                |                | HMFCa   | n.q.           | n.q.           |
|             |                |                | FFCA    | $17.9 \pm 3.7$ | $4.7 \pm 1.0$  |
|             |                |                | FDCA    | $66.4 \pm 3.5$ | $26.2 \pm 1.3$ |
|             |                |                | MA**    | $5.8 \pm 0.1$  | $4.6 \pm 0.1$  |
| <b>18 F</b> | 100.0          | $87.7 \pm 0.8$ | DFF     | 0.0            | 0.0            |
|             |                |                | HMFCa   | 0.0            | 0.0            |
|             |                |                | FFCA    | $1.4 \pm 0.5$  | $0.3 \pm 0.1$  |
|             |                |                | FDCA    | $77.1 \pm 1.3$ | $21.0 \pm 0.3$ |
|             |                |                | MA**    | $9.2 \pm 0.0$  | $5.0 \pm 0.0$  |
| <b>24 F</b> | 100.0          | $83.8 \pm 1.6$ | DFF     | 0.0            | 0.0            |
|             |                |                | HMFCa   | 0.0            | 0.0            |
|             |                |                | FFCA    | 0.0            | 0.0            |
|             |                |                | FDCA    | $71.5 \pm 1.8$ | $14.8 \pm 0.3$ |
|             |                |                | MA**    | $12.3 \pm 0.2$ | $5.1 \pm 0.1$  |

n.q. = not quantifiable
